# Supplementary material for: Building thermally stable Li-ion batteries using a temperature-responsive cathode
Source: Royal Society of Chemistry journal article supplement (doi:10.1039/c6ta03407a), 2016-01-01
Supplement: c6ta03407a1.pdf [file c6ta03407a1.pdf]

## Supporting Information

### Building Thermal-stable Li-ion Batteries Using a Temperature-responsive Cathode

Weixiao Ji<sup>1</sup>, Feng Wang<sup>1</sup>, Daotan Liu<sup>3</sup>, Jiangfeng Qian<sup>1</sup>, Yuliang Cao<sup>1</sup>, Zhongxue Chen<sup>2</sup>✉, Hanxi Yang<sup>1</sup>, Xiping Ai<sup>1</sup>✉

<sup>1</sup>College of Chemistry and Molecular Science, Wuhan University, Wuhan 430072, China.

<sup>2</sup>School of Power and Mechanical Engineering, Wuhan University, Wuhan 430072, China.

<sup>3</sup>China Electric Power Research Institute, Beijing 100192, China.

\*e-mail: xpai@whu.edu.cn ; zxchen\_pmc@whu.edu.cn

**Table S1.** A comparison for the properties of various conducting polymers

| Polymer | Dopant                             | Transition temperature ( ° C) | PTC intensity (orders of magnitude) | Processability at 25 ° C | Solubility in electrolyte solvents at 25 ° C |
|---------|------------------------------------|-------------------------------|-------------------------------------|--------------------------|----------------------------------------------|
| P3HPy   | FeCl <sub>3</sub>                  | 90 -120                       | 4                                   | easy                     | soluble                                      |
| PTH     | HClO <sub>4</sub>                  | 160 -170                      | 3                                   | difficult                | insoluble                                    |
| P3MT    | HClO <sub>4</sub>                  | 160 -170                      | 4                                   | difficult                | insoluble                                    |
| P3BT    | Cu(ClO <sub>4</sub> ) <sub>2</sub> | 130 -140                      | 3                                   | easy                     | insoluble                                    |
| P3OT    | Cu(ClO <sub>4</sub> ) <sub>2</sub> | 90 -110                       | 3                                   | easy                     | insoluble                                    |
| P3DT    | Cu(ClO <sub>4</sub> ) <sub>2</sub> | 80 -100                       | 4                                   | easy                     | slightly soluble                             |
| PEDOT   | HClO <sub>4</sub>                  | > 220                         | 2                                   | difficult                | insoluble                                    |

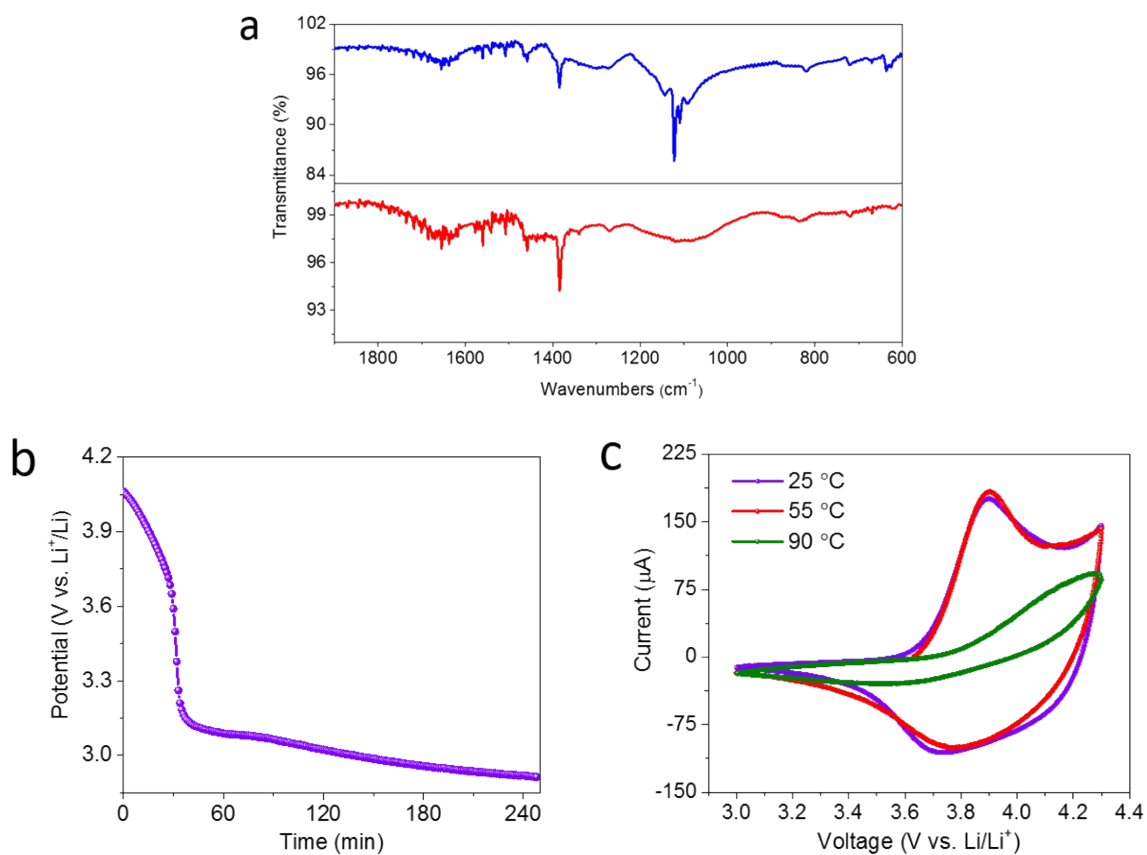

**Fig.S1** Thermal de-doping behaviors of p-doped P3OT polymer: a) FT-IR spectra of  $\text{ClO}_4^-$  anions-doped P3OT polymer before and after thermal treatment at  $90\text{ }^{\circ}\text{C}$ . b) the time dependence of the open-circuit potential for an electrochemically p-doped P3OT electrode at  $90\text{ }^{\circ}\text{C}$ . c) CV curves obtained from P3OT-coated Pt microelectrode in  $1\text{M LiPF}_6 / \text{EC} + \text{DMC} + \text{EMC}$  electrolyte at a scan rate of  $10\text{ mV s}^{-1}$  at various temperatures.

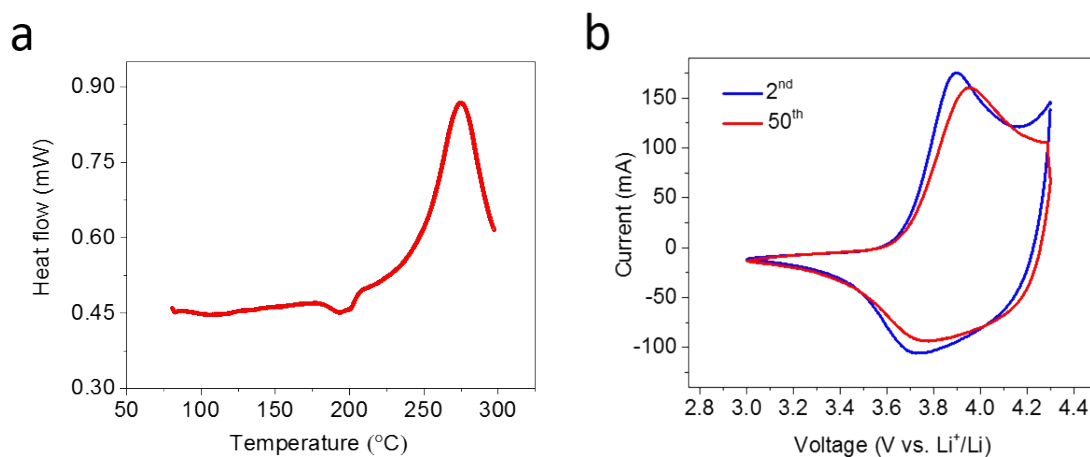

**Fig.S2** Thermal and electrochemical stability of P3OT polymer: a) DSC curves of P3OT polymer in a temperature range of 80 – 300 °C at a scan rate of 10 °C min<sup>-1</sup> under N<sub>2</sub> atmosphere. b) CV curves obtained from P3OT-coated Pt microelectrode in 1M LiPF<sub>6</sub>/EC+DMC+EMC electrolyte at a scan rate of 10 mV s<sup>-1</sup> at room temperature.

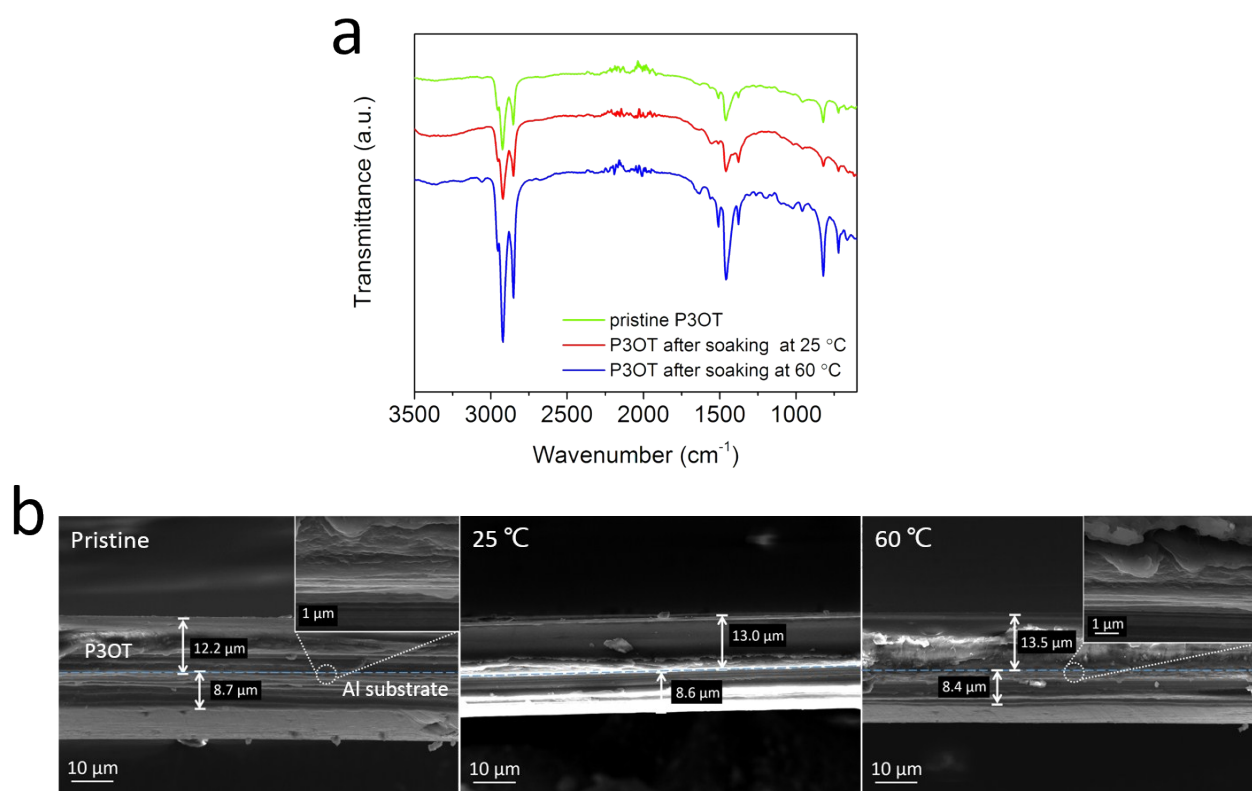

**Fig.S3.** Structural and chemical stability characterization for P3OT layer under the presence of liquid electrolyte. a) FT-IR spectra and b) the cross-sectional SEM images of P3OT layer before and after soaking in 1M LiPF<sub>6</sub>/EC+DMC+EMC electrolyte solution for a week at 25 °C and 60 °C, respectively.

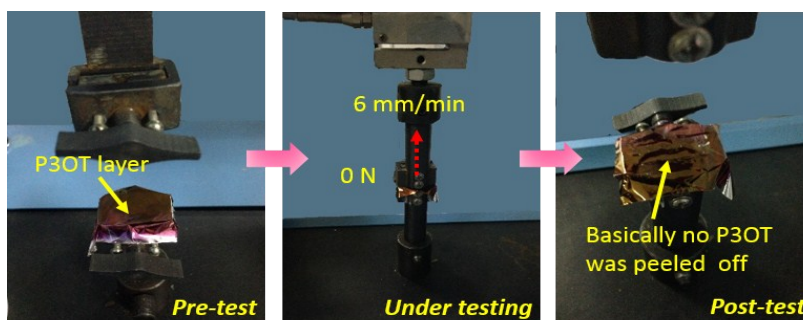

**Fig.S4.** The photo illustration for the interfacial adhesion measurements.

**Table S2.** Results of interfacial adhesion tests

|                                       | PTC layer toward Al substrate | LCO layer toward Al substrate | LCO layer toward PTC layer |
|---------------------------------------|-------------------------------|-------------------------------|----------------------------|
| Adhesion force ( $\text{N cm}^{-2}$ ) | > 38.3                        | 27.3                          | 27.1                       |
| The corresponding electrode           | Al/P3OT electrode             | Al/LCO electrode              | Al/P3OT/LCO electrode      |

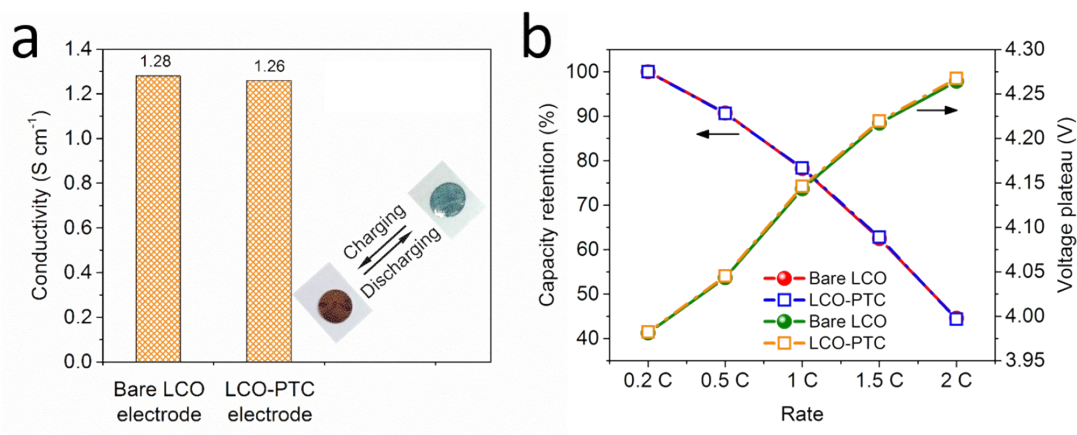

**Fig.S5.** DC conductivity and the rate capability tests: a) The DC conductivities of bare LCO electrode and LCO-PTC electrode after fully charged, the inset shows the color changes of P3OT electrode before and after electrochemical p-doping. b) Rate performance of pouch full cells with the LCO-PTC and conventional LCO cathode at 25 °C.
